# Supplementary material for: Scalable recombinase-based gene expression cascades
Source: PubMed Central journal article supplement (PMC8113245; doi:10.1038/s41467-021-22978-4), 2021-05-11
Supplement: 41467_2021_22978_MOESM1_ESM.pdf [file 41467_2021_22978_MOESM1_ESM.pdf]

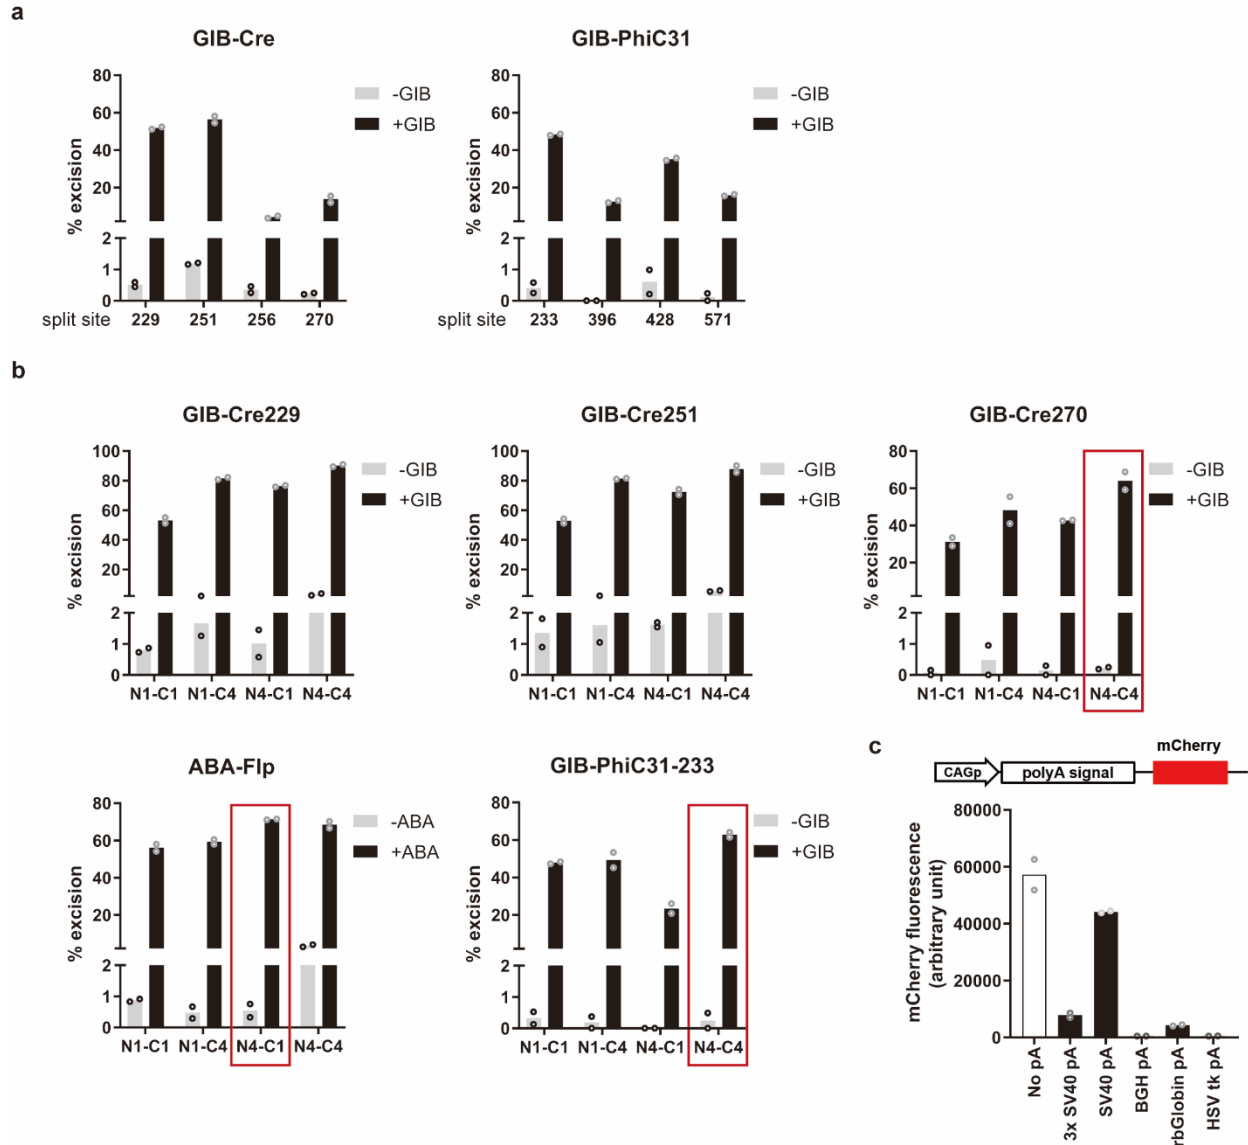

**Supplementary Fig. 1. Optimization of unit GPCs.** a-b) % BFP positive cells were calculated as % self-excision of GPCs with the experimental designs described in Fig. 1b. Excision frequency was calculated as %BFP+/%(BFP+ or GFP+) as was done for Fig. 1d. a, Determination of ideal recombinase split sites for minimal leakage in the absence of ligand and efficient ligand-induced self-excision of GPCs (n=2, values indicate mean). Split recombinases with site x involved N terminal fragment of amino acids 1-x, and C terminal fragment of amino acids x+1 to the end of the recombinase polypeptide. b, Determination of optimal number of nuclear localization signals (NLS) fused to each fragment of split recombinases for best activity in the presence of ligands (n=2, values indicate mean). Nx-Cy indicates that the N-terminal fragment of recombinase was fused with x NLS(s), and the C terminal fragment was fused with y NLS(s). Red rectangles indicate the optimized split-recombinases used throughout this study. c, Comparison of different polyadenylation signals for efficient transcription termination (n=2, values indicate mean). Source data are provided as a source data file.

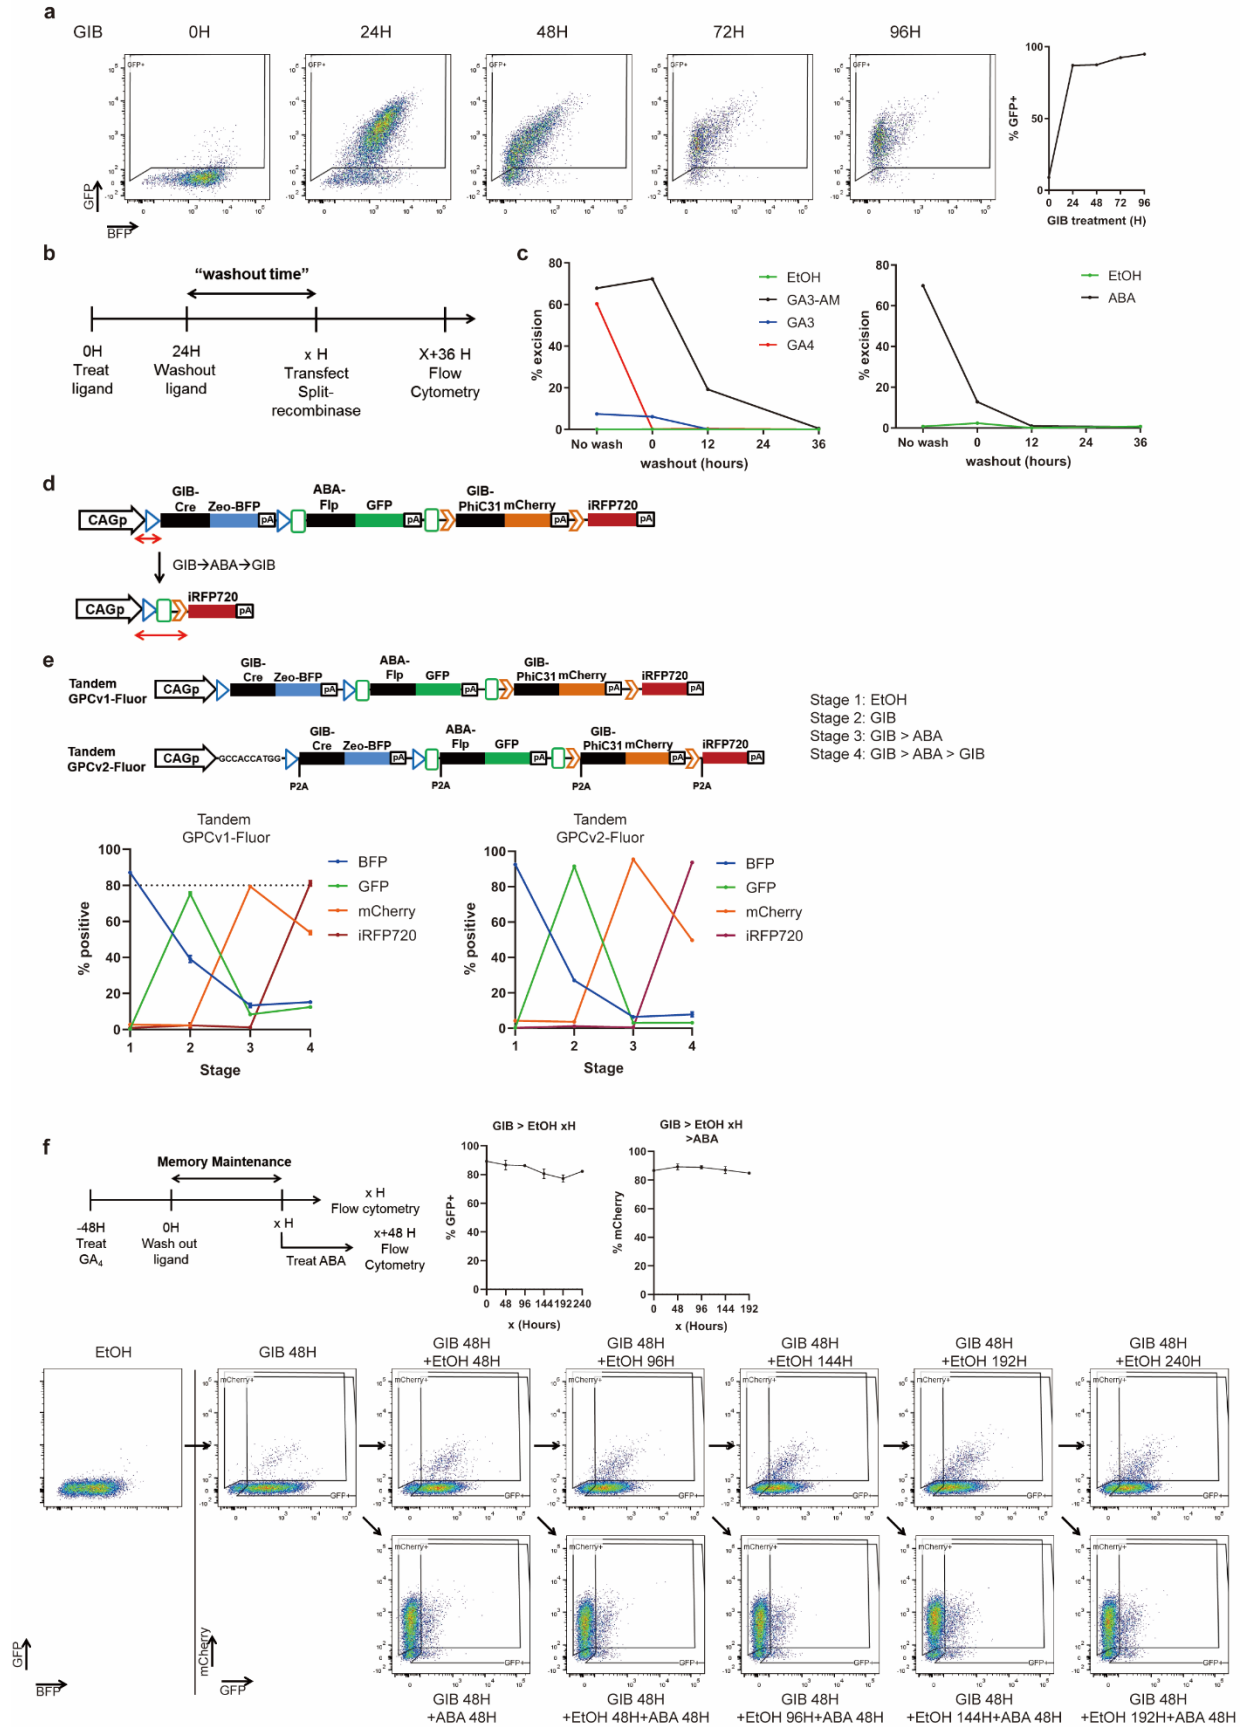

**Supplementary Fig. 2. Optimization of tandem GPC circuit.** a, Kinetics of recombinase-induced excision after ligand treatment. Tandem GPCv2-Fluor was treated with GA<sub>4</sub> for indicated durations. Excision was monitored as % GFP positive cells. (Left) Representative flow cytometry plots, (Right) Quantification of the % GFP positive cells (n=2, values indicate mean). b-c) Kinetics of CID ligand decay. b, Cells were pretreated with various versions of gibberellin or abscisic acid. Gibberellin treated cells were transfected with plasmid encoding GIB-Cre GPC (used in fig. 1d) at indicated time points after ligand washout. ABA treated cells were transfected with plasmid encoding ABA-Flp GPC (used in fig. 1d) at indicated time points after ligand washout. c, Quantification of the % excised cells with GPCs delivered after various washout time (n=2, values indicate mean). d, Lengthening of “scar” 5’-UTR sequences after each excision. The “scar” sequence is indicated with the red arrow. e, Improved “tandem GPCv2” circuit design to prevent 5’-UTR lengthening. Line graphs below show the fraction of cells expressing indicated payload gene after each indicated sequence of ligand treatment. f, Memory maintenance by the gene expression cascade. (Top left) Experimental scheme. (Top right) Quantification of mean GFP level and fraction of GFP positive cells, and mean mCherry level after 48 hours of ABA treatment with fraction of mCherry positive cells (n=3, mean± s.d.) (Bottom) Representative flow cytometry plots. Source data are provided as a source data file.

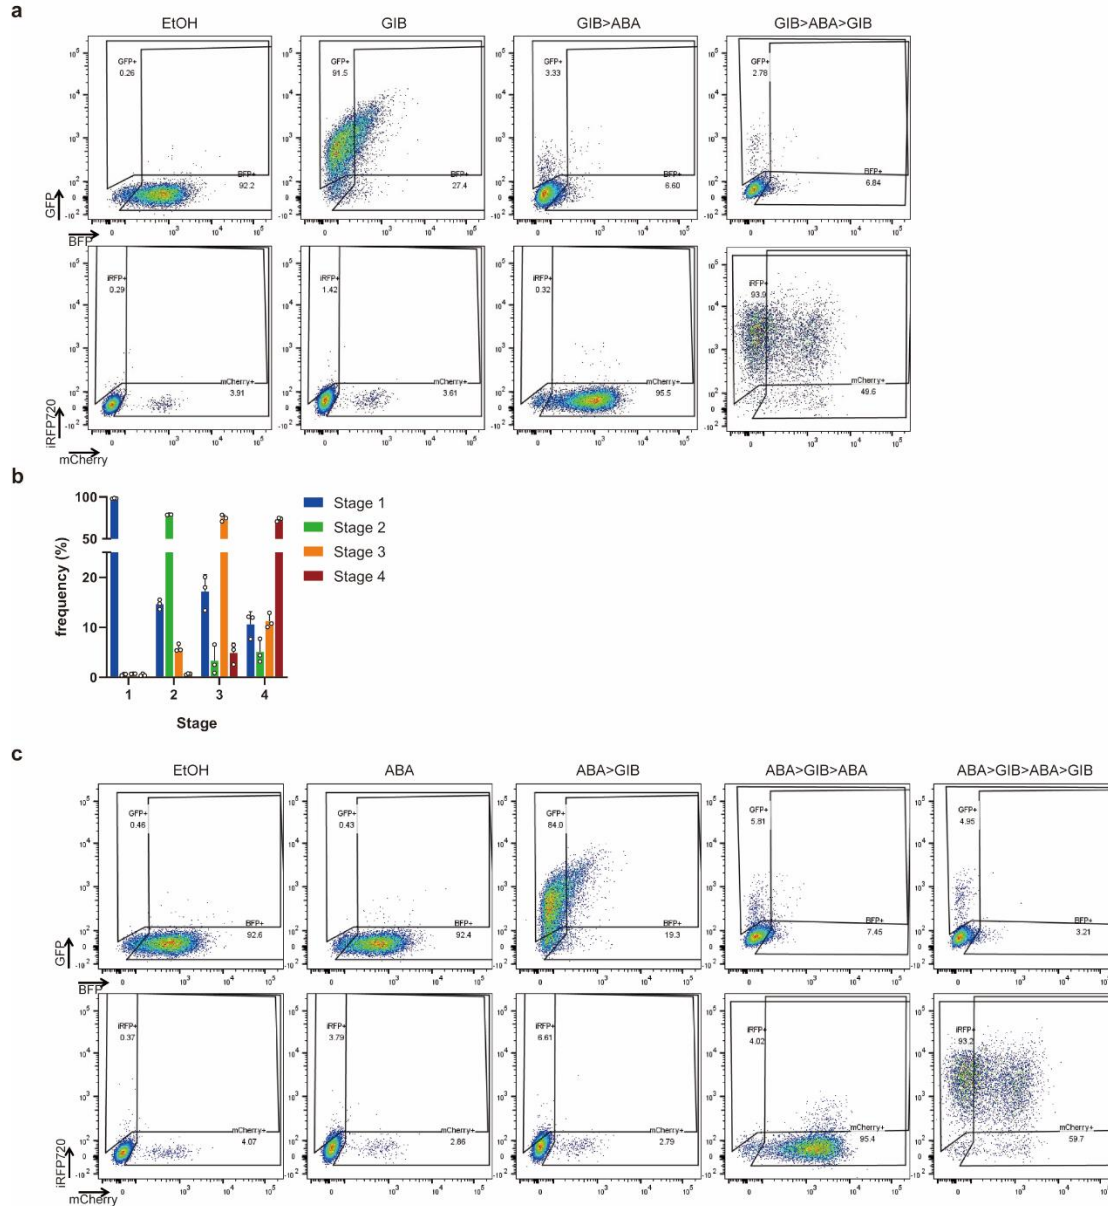

**Supplementary Fig. 3. Tandem GPCv2-Fluor enables robust, sequential expression of fluorescent proteins.** a. Flow cytometry plots for all relevant fluorescence channels for the data shown in Figure 2b-c. b. NGS analysis of the PCR amplicon consisting of scar sequence from cells used in Figure 2b-c. Each bar indicates the frequency of the detected scar sequence that corresponds to each stage in the cascade at the actual stage within the cascade, indicated below ( $n=3$ , mean  $\pm$  s.d.). c. Flow cytometry plots for all relevant fluorescence channels for the data shown in Figure 2d. Source data are provided as a source data file.

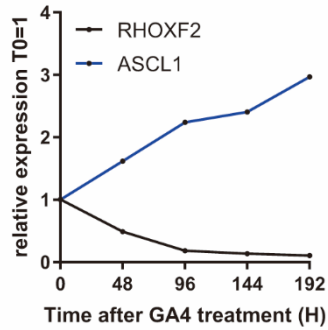

**Supplementary Fig. 4. Optimization of tandem GPC circuit for sequential sgRNA expression.** Kinetics of sgRNA expression and decay after excision of GPC. Tandem GPCv2-CRISPRa was treated with gibberellin for the indicated durations. RT-qPCR quantification of the relative expression level of the target genes RHOXF2, ASCL1, the target of the first and second payload sgRNA, respectively (n=2, values indicate mean± s.d.). Source data are provided as a source data file.

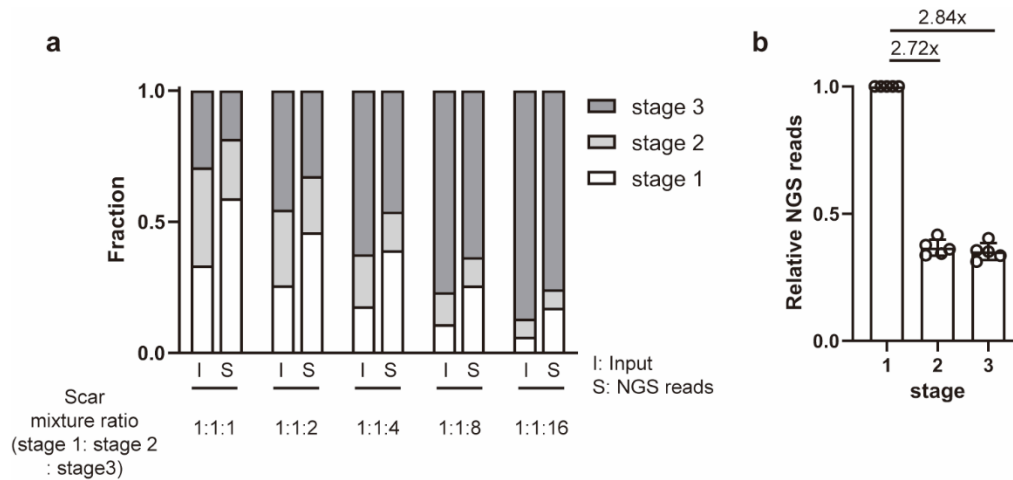

**Supplementary Fig 5. PCR bias of the scar sequence amplification.** a. Ratio of each scar DNA detected by NGS reads (S) compared to the ratio of each scar DNA in the input (I) DNA used for PCR amplification and subsequent NGS analysis. b. Relative sequence reads for scar sequence of each stage when they are mixed together (n=5, mean± s.d.). Source data are provided as a source data file.

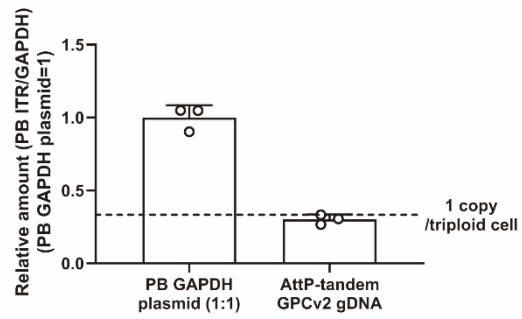

**Supplementary Fig. 6. Copy number of the gene circuit in the cells carrying AttP-tandem GPCv2 used in figure 4.** (n=3, mean  $\pm$  s.d.). Source data are provided as a source data file.

**Supplementary table 1.**

List of plasmids used in this study.

| Name    | Description                                  | Used in Figure                                           |
|---------|----------------------------------------------|----------------------------------------------------------|
| pTK1173 | EFS-LoxPGIBCre251-GFP-LoxP-BFP               | Supplementary Fig. 1a                                    |
| pTK1174 | EFS-LoxPGIBCre229-GFP-LoxP-BFP               | Supplementary Fig. 1a                                    |
| pTK1175 | EFS-LoxPGIBCre256-GFP-LoxP-BFP               | Supplementary Fig. 1a                                    |
| pTK1176 | EFS-LoxPGIBCre270-GFP-LoxP-BFP               | Supplementary Fig. 1a                                    |
| pTK1181 | EFS-LoxPGIBCre229-GFP-LoxP-BFP with 4x-1xNLS | Supplementary Fig. 1b                                    |
| pTK1182 | EFS-LoxPGIBCre229-GFP-LoxP-BFP with 1x-4xNLS | Supplementary Fig. 1b                                    |
| pTK1183 | EFS-LoxPGIBCre229-GFP-LoxP-BFP with 4x-4xNLS | Supplementary Fig. 1b                                    |
| pTK1184 | EFS-LoxPGIBCre251-GFP-LoxP-BFP with 4x-1xNLS | Supplementary Fig. 1b                                    |
| pTK1185 | EFS-LoxPGIBCre251-GFP-LoxP-BFP with 1x-4xNLS | Supplementary Fig. 1b                                    |
| pTK1186 | EFS-LoxPGIBCre251-GFP-LoxP-BFP with 4x-4xNLS | Supplementary Fig. 1b                                    |
| pTK1187 | EFS-LoxPGIBCre270-GFP-LoxP-BFP with 4x-1xNLS | Supplementary Fig. 1b                                    |
| pTK1188 | EFS-LoxPGIBCre270-GFP-LoxP-BFP with 1x-4xNLS | Supplementary Fig. 1b                                    |
| pTK1189 | EFS-LoxPGIBCre270-GFP-LoxP-BFP with 4x-4xNLS | Figs. 1c-e, Supplementary Fig. 1b, Supplementary Fig. 2c |
| pTK1224 | EFS-FRT ABAFlpO-GFP-FRT-BFP                  | Supplementary Fig. 1b                                    |
| pTK1225 | EFS-FRT ABAFlpO-GFP-FRT-BFP with 4x-1xNLS    | Figs. 1c-e, Supplementary Fig. 1b, Supplementary Fig. 2c |
| pTK1226 | EFS-FRT ABAFlpO-GFP-FRT-BFP with 1x-4xNLS    | Supplementary Fig. 1b                                    |
| pTK1227 | EFS-FRT ABAFlpO-GFP-FRT-BFP with 4x-4xNLS    | Supplementary Fig. 1b                                    |
| pTK1196 | EFS AttP-GIBPhiC233-GFP-AttB-BFP             | Supplementary Fig. 1a                                    |
| pTK1197 | EFS AttP-GIBPhiC396-GFP-AttB-BFP             | Supplementary Fig. 1a                                    |
| pTK1198 | EFS AttP-GIBPhiC428-GFP-AttB-BFP             | Supplementary Fig. 1a                                    |



|         |                                                                  |                                                                                   |
|---------|------------------------------------------------------------------|-----------------------------------------------------------------------------------|
| pTK1199 | EFS AttP-GIBPhiC571-GFP-AttB-BFP                                 | Supplementary Fig. 1a                                                             |
| pTK1204 | EFS AttP-GIBPhiC233-GFP-AttB-BFP with 4x-1xNLS                   | Supplementary Fig. 1b                                                             |
| pTK1205 | EFS AttP-GIBPhiC233-GFP-AttB-BFP with 1x-4xNLS                   | Supplementary Fig. 1b                                                             |
| pTK1206 | EFS AttP-GIBPhiC233-GFP-AttB-BFP with 4x-4xNLS                   | Figs. 1c-e, Supplementary Fig. 1b                                                 |
| pTK1423 | EFS-LoxP-GIBCre270 Y324F GFP-LoxP-BFP with 4x-4xNLS              | Figs. 1c-e                                                                        |
| pTK1115 | PB CAG-3xSVpA-mCherry                                            | Supplementary Fig. 1c                                                             |
| pTK1116 | PB CAG-1xSVpA-mCherry                                            | Supplementary Fig. 1c                                                             |
| pTK1117 | PB CAG-BGHpA-mCherry                                             | Supplementary Fig. 1c                                                             |
| pTK1118 | PB CAG-rbGlobpA-mCherry                                          | Supplementary Fig. 1c                                                             |
| pTK1119 | PB CAG-HSVpA-mCherry                                             | Supplementary Fig. 1c                                                             |
| pTK1230 | PB CAG-2xSapI-iRFP w/o PEST for tGPC v1                          | Supplementary Fig. 2e                                                             |
| pTK1263 | PB CAG-iRFP720 w/o PEST for tGPC v2                              | Figs. 2b-e, Supplementary Fig. 2a, Supplementary Figs. 2e-f                       |
| pTK1442 | EFS-LoxPGIBCre270-ZeoBFP-3xBGH-2xcHS4 with 4x-4xNLS for tGPC v1  | Supplementary Fig. 2e                                                             |
| pTK1443 | EFS-FRT-ABAFIpO-GFP-3xBGH-2xcHS4 with 1x-4xNLS for tGPC v1       | Supplementary Fig. 2e                                                             |
| pTK1444 | EFS-AttP-GIBcphiC-mCherry-3xBGH-2xcHS4 with 4x-4xNLS for tGPC v1 | Supplementary Fig. 2e                                                             |
| pTK1445 | EFS-LoxPGIBCre270-ZeoBFP-3xBGH-2xcHS4 with 4x-4xNLS for tGPC v2  | Figs. 2b-e, Supplementary Fig. 2a, Supplementary Figs. 2e-f, Supplementary Fig. 3 |
| pTK1446 | EFS-FRT-ABAFIpO-GFP-3xBGH-2xcHS4 with 1x-4xNLS for tGPC v2       | Figs. 2b-e, Supplementary Fig. 2a, Supplementary Figs. 2e-f, Supplementary Fig. 3 |
| pTK1447 | EFS-AttP-GIBcphiC-mCherry-3xBGH-2xcHS4 with 4x-4xNLS for tGPC v2 | Figs. 2b-e, Supplementary Fig. 2a, Supplementary Figs. 2e-f,                      |

|         |                                                                               |                                                                                   |
|---------|-------------------------------------------------------------------------------|-----------------------------------------------------------------------------------|
|         |                                                                               | Supplementary Fig. 3                                                              |
| pTK1312 | PB EF1a-dCas9-VPR-P2a-Csy4-CAG-28-sgTTN-28                                    | Fig. 3a                                                                           |
| pTK1313 | PB EF1a-dCas9-VPR-P2a-CAG-tRNA <sup>Gly C55G</sup> -sgTTN-tRNA <sup>Gly</sup> | Fig. 3a                                                                           |
| pTK1314 | PB EF1a-dCas9-VPR-P2a-Csy4-CAG-20-sgTTN-20                                    | Fig. 3a                                                                           |
| pTK1328 | PB EF1a-dCas9-VPR-P2a-CAG-HH-sgTTN-HDV                                        | Fig. 3a                                                                           |
| pTK1280 | FUW sgTTN-CMV <sub>minP</sub> -RFP-CMV-Puro                                   | Fig. 3a                                                                           |
| pTK1448 | EFS-LoxPGIBCre270-Zeo-20-sgRHOXF2-20-3xBGHpA-2xcHS4 with 4x-4xNLS             | Figs. 3b-c, Supplementary Fig. 3                                                  |
| pTK1449 | EFS-FRT-ABAFIpO-20-sgASCL1-20-3xBGHpA-2xcHS4 with 1x-4xNLS                    | Figs. 3b-c, Supplementary Fig. 4, 3b-c                                            |
| pTK1450 | EFS-AttP-GIBCphiC-20-sgHBG-20-3xBGHpA-2xcHS4 with 4x-4xNLS                    | Figs. 3b-c, Supplementary Fig. 4                                                  |
| pTK1451 | EFS-LoxPGIBCre270-Zeo-20-sgAPC-20-3xBGHpA-2xcHS4 with 4x-4xNLS                | Figs. 3d-g, Figs. 4a-f                                                            |
| pTK1452 | EFS-FRT-ABAFIpO-20-sgMLH1-20-3xBGHpA-2xcHS4 with 1x-4xNLS                     | Figs. 3d-g, Figs. 4a-f                                                            |
| pTK1453 | EFS-AttP-GIBphiC-20-sgSMAD4-20-3xBGHpA-2xcHS4 with 4x-4xNLS                   | Figs. 3d-g                                                                        |
| pTK1492 | EFS-GIBphiC-20-Puro-sgSMAD4-20-3xBGHpA-2xcHS4 with 4x-4xNLS w/o AttP          | Figs. 4a-f                                                                        |
| pTK1501 | PB CAG-Cas9-P2a-Csy4-P2a-2xSapI-sgTP53                                        | Figs. 3d-g                                                                        |
| pTK1502 | PB CAG-dCas9-VPR-P2a-Csy4-P2a-2xSapI-sgTTN                                    | Figs. 3b-c, Supplementary Fig. 4                                                  |
| pTK1503 | PB AttP-CAG-Cas9-P2a-Csy4-P2a-2xSapI                                          | Figs. 4a-f                                                                        |
| pTK1601 | tGPC Fluor v1=pTK1230+1442+1443+1444                                          | Supplementary Fig. 2e                                                             |
| pTK1602 | tGPC Fluor v2=pTK1263+1445+1446+1447                                          | Figs. 2b-e, Supplementary Fig. 2a, Supplementary Figs. 2e-f, Supplementary Fig. 3 |
| pTK1603 | tGPC-CRISPRa=pTK1502+1448+1449+1450                                           | Figs. 3b-c, Supplementary Fig. 4                                                  |
| pTK1604 | tGPC-CRISPR=pTK1501+1451+1452+1453                                            | Figs. 3d-g                                                                        |
| pTK1605 | tGPC-AttP-CRISPR=pTK1503+1451+1452+1492                                       | Figs. 4a-f                                                                        |

**Supplementary table 2.**

Protospacer sequences of sgRNA used in this study.

| Gene          | Sequence             |
|---------------|----------------------|
| <i>RHOXF2</i> | AACGCGTGCTCTCCCTCATC |
| <i>ASCL1</i>  | CGGGAGAAAGGAACGGGAGG |
| <i>HBG</i>    | CTTGACCAATAGCCTTGACA |
| <i>TTN</i>    | CCTTGGTGAAGTCTCCTTTG |
| <i>APC</i>    | TCTGTATAAATGGCTCATCG |
| <i>MLH1</i>   | TAATAGTAACATGAGCCACA |
| <i>SMAD4</i>  | TGTCCTTCAGTGGACAACGA |
| <i>TP53</i>   | CCATTGTTCAATATCGTCCG |

**Supplementary table 3.**

PCR primers for RT-qPCR.

| Gene          | Sequence                |
|---------------|-------------------------|
| <i>RHOXF2</i> | F: GGCAAGAAGCATGAATGTGA |
|               | R: GCCATTAATGCCCTCTGATG |
| <i>ASCL1</i>  | F: CGCGGCCAACAAGAAGATG  |
|               | R: CGACGAGTAGGATGAGACCG |
| <i>HBG</i>    | F: AGATGCCACAAAGCACCTG  |
|               | R: CTGCAGTCACCATCTTCTGC |
| <i>TTN</i>    | F: TGTTGCCACTGGTGCTAAAG |
|               | R: ACAGCAGTCTTCTCCGCTTC |

**Supplementary table 4.**

PCR primers used for T7 endonuclease assay.

| Gene         | Sequence                |
|--------------|-------------------------|
| <i>APC</i>   | F: CCCTAGAACCAAATCCAGCA |
|              | R: TATCATCCCCCGGTGTAAAA |
| <i>MLH1</i>  | F: GACCCCGTCATAGCACAGTT |
|              | R: GCAAAGGGGCAGAAATTACA |
| <i>SMAD4</i> | F: TTGGGTTGGGTTTCTAGAGG |
|              | R: GTGGAAGCCACAGGAATGTT |
| <i>TP53</i>  | F: AGGGTGTGATGGGATGGATA |
|              | R: CTGCCCTGGTAGGTTTTCTG |

**Supplementary table 5.**

PCR primers used for next generation sequencing analysis to quantify indel frequency. Six-nucleotide barcodes “NNNNNN” were used for multiplexing.

| Gene         | Sequence                         |
|--------------|----------------------------------|
| <i>APC</i>   | F: NNNNNNTCCAGGTTCTTCCAGATGCT    |
|              | R: TTTTCTGCCTCTTTCTCTTGG         |
| <i>MLH1</i>  | F: NNNNNNCCCTTTGGTGAGGTGACAGT    |
|              | R: CGTACTCAAGATCTCTGCCAAA        |
| <i>SMAD4</i> | F: NNNNNNTCAAGTATGATGGTGAAGGATGA |
|              | R: CTTGTGGAAGCCACAGGAAT          |
| <i>TP53</i>  | F: NNNNNNCTGCCCTGGTAGGTTTCTG     |
|              | R: CCTGGTCCTCTGACTGCTCT          |

**Supplementary Table 6**

Primers used for quantitative PCR analysis of the gene circuit excision efficiency.

| Gene                      | Sequence                |
|---------------------------|-------------------------|
| Piggybac<br>5' ITR        | F: GCTGCTGTGCATTAGGACA  |
|                           | R: CACGCGGTCGTTATAGTTCA |
| Cas9                      | F: CCGAAGAGGTCGTGAAGAAG |
|                           | R: GCCTTATCCAGTTCGCTCAG |
| <i>GAPDH</i><br>(genomic) | F: CGTAGCTCAGGCCTCAAGAC |
|                           | R: GTCGAACAGGAGGAGCAGAG |
